# Supplementary material for: Structural, elastic and electronic properties of atomically thin pyridyne: theoretical predictions
Source: Royal Society of Chemistry journal article supplement (doi:10.1039/d0cp06504h), 2021-01-01
Supplement: d0cp06504h1.pdf [file d0cp06504h1.pdf]

**Structural, Elastic and Electronic Properties of Atomically Thin Pyridyne:  
Theoretical Predictions**

Chuan Liu,<sup>\*,a</sup> Shuaishuai Wang,<sup>a</sup> Xuchun Wang,<sup>a</sup> Xiangju Ye,<sup>a</sup> Zirong Li,<sup>a</sup> Jumeng Wei,<sup>a</sup> Ping Cheng<sup>\*,b</sup> and Yingjie Li<sup>c</sup>

*<sup>a</sup>College of Chemistry and Materials Engineering, Anhui Science and Technology University, Bengbu, 233000, China*

*<sup>b</sup>College of Science, University of Shanghai for Science and Technology, Shanghai, 200093, China*

*<sup>c</sup>Anhui Key Lab of Coal Clean Conversion and Utilization, Anhui University of Technology, Maanshan, 243032, China*

\*Corresponding author

*E-mail:* [liuxc@ahstu.edu.cn](mailto:liuxc@ahstu.edu.cn) (Chuan Liu); [chengp@usst.edu.cn](mailto:chengp@usst.edu.cn) (Ping Cheng)

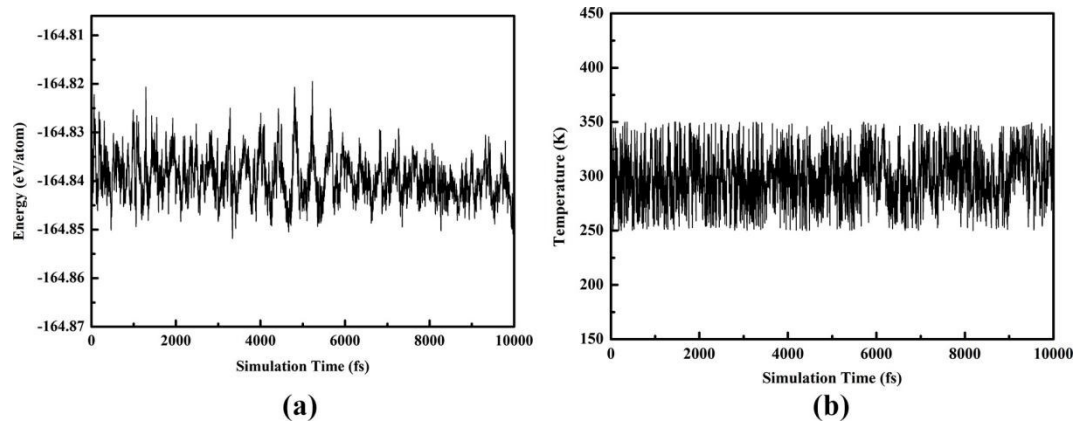

**Fig. S1.** (a) and (b) show total energy and temperature fluctuations of pyridyne at 300 K, respectively.

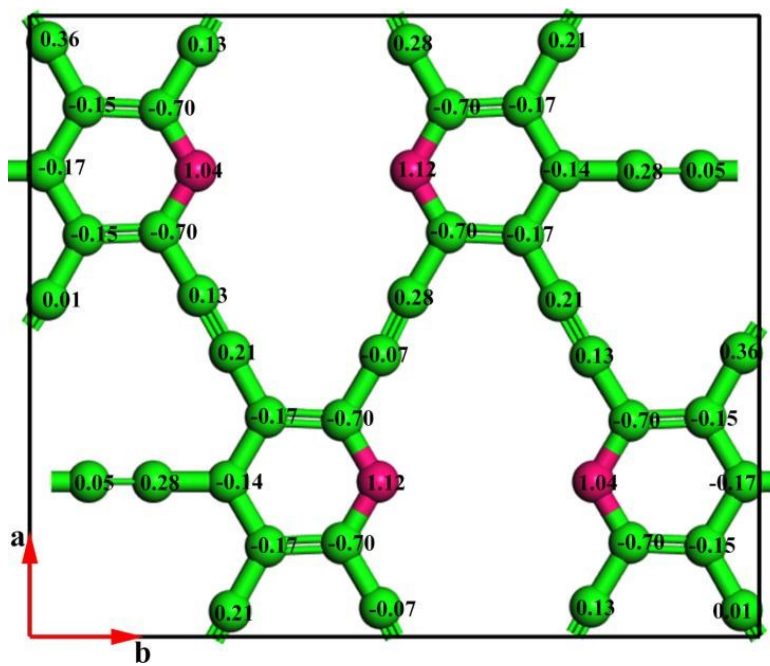

**Fig. S2.** The bader atomic charge of each atom in pyridyne, and the unit is electron charge (e).

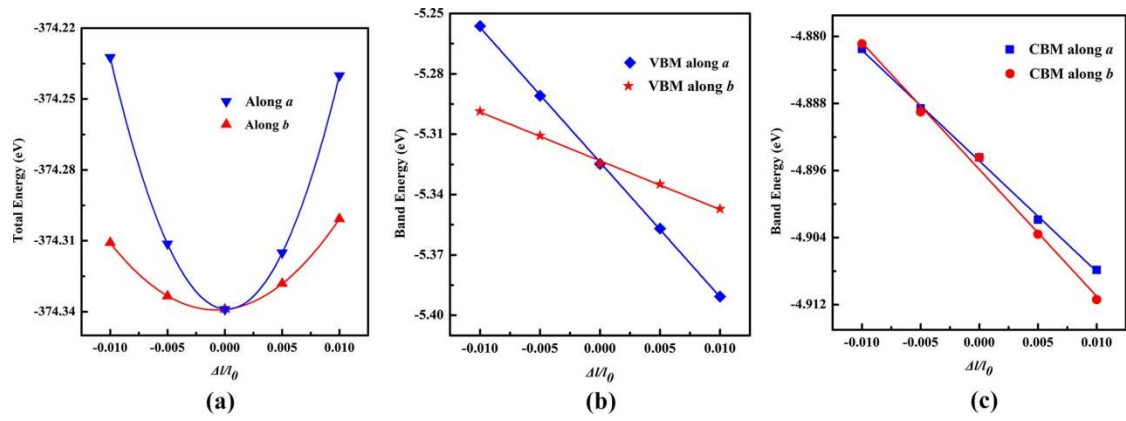

**Fig. S3.** (a) Strain-total energy relations and the energy shifts of (b) VBM and (c) CBM with respect the vacuum energy under uniaxial strain along the *a* and *b* directions for pyridyne.
